# Supplementary material for: Controlled stepwise-synthesis of core–shell Au@MIL-100 (Fe) nanoparticles for sensitive surface-enhanced Raman scattering detection
Source: Royal Society of Chemistry journal article supplement (doi:10.1039/c5an01657f), 2015-01-01
Supplement: c5an01657f1.pdf [file c5an01657f1.pdf]

# Supporting Information

## **Controlled Stepwise-Synthesis of Core-Shell Au@MIL-100 (Fe) Nanoparticles for Sensitive Surface-Enhanced Raman Scattering Detection**

Jia Liao†, Dongmei Wang†, Anqi Liu, Yuling Hu\*, Gongke Li\*

*School of Chemistry and Chemical Engineering, Sun Yat-sen University, Guangzhou, 510275, China*

\* Corresponding author: Y.L. Hu, G.K. Li

Tel. : +86-20-84110922

Fax : +86-20-84115107

E-mail : [ceshyl@mail.sysu.edu.cn](mailto:ceshyl@mail.sysu.edu.cn);

[cesgkl@mail.sysu.edu.cn](mailto:cesgkl@mail.sysu.edu.cn)

† This authors contributed equally to this paper

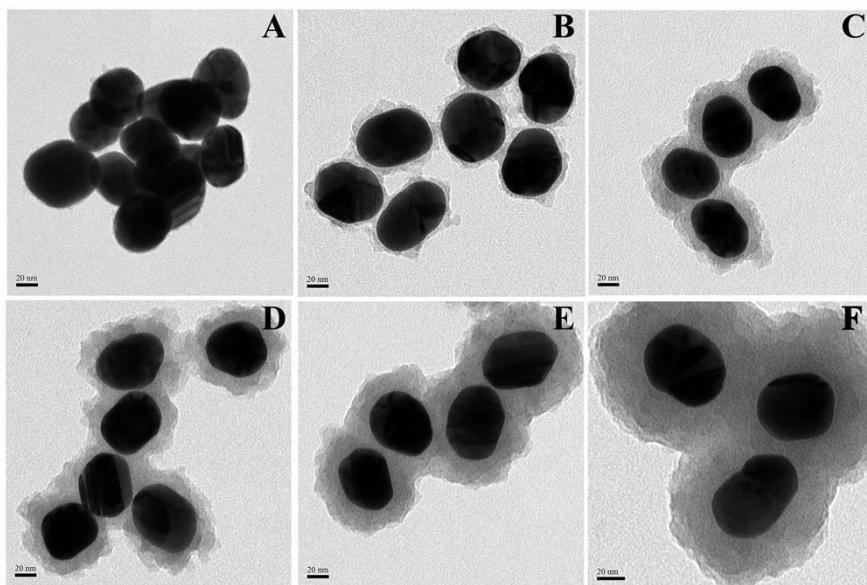

Figure S1 TEM images of Au@MIL-100 (Fe) core-shell nanoparticles (recycle number (A)-(F): 1, 2, 3, 4, 5, 7)

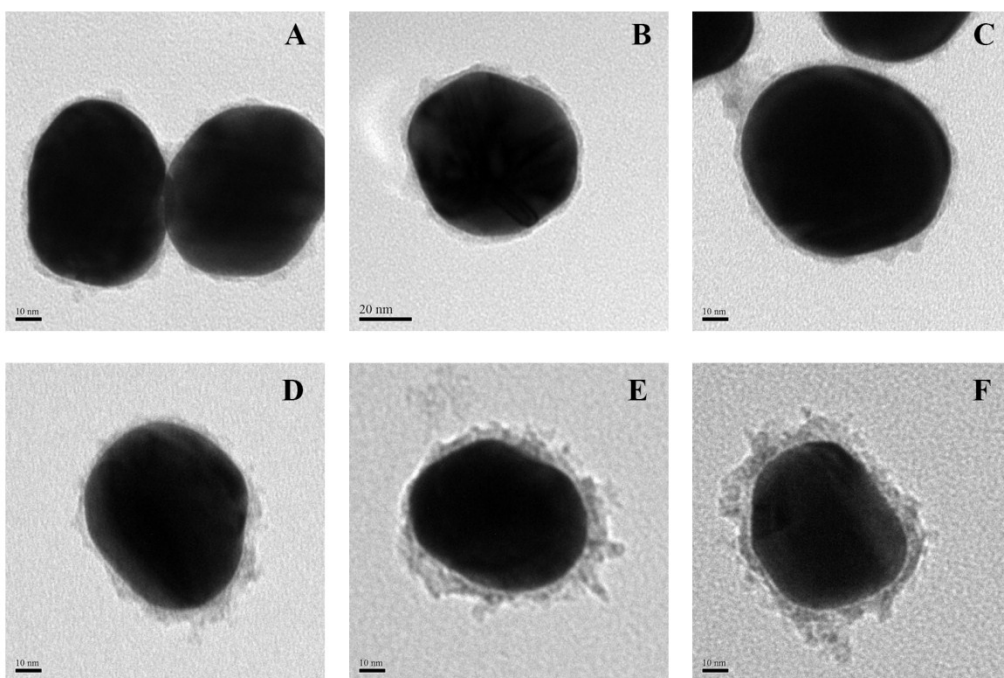

Figure S2 TEM images of Au@MIL-100 (Fe) synthesized at room temperature with the precursor concentration of 0.1 mmol/L (A), 1.0 mmol/L (B), 5.0 mmol/L (C) and at 75 °C with the concentration of 0.1 mmol/L (D), 1.0 mmol/L (E), 5.0 mmol/L (F).

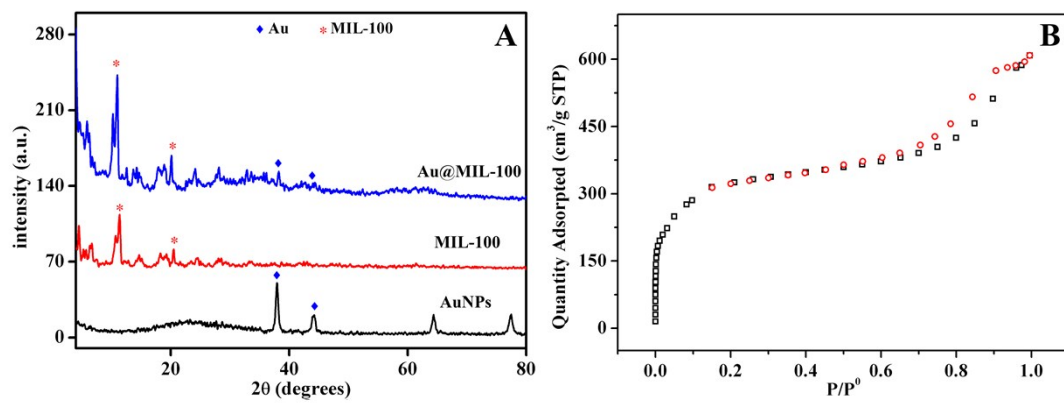

Figure S3 XRD pattern of the pure AuNPs, pure MIL-100 (Fe) and Au@MIL-100 (Fe) (A), and nitrogen sorption isotherm at 77 K for Au@MIL-100 (Fe) with 40 cycles growth (B)

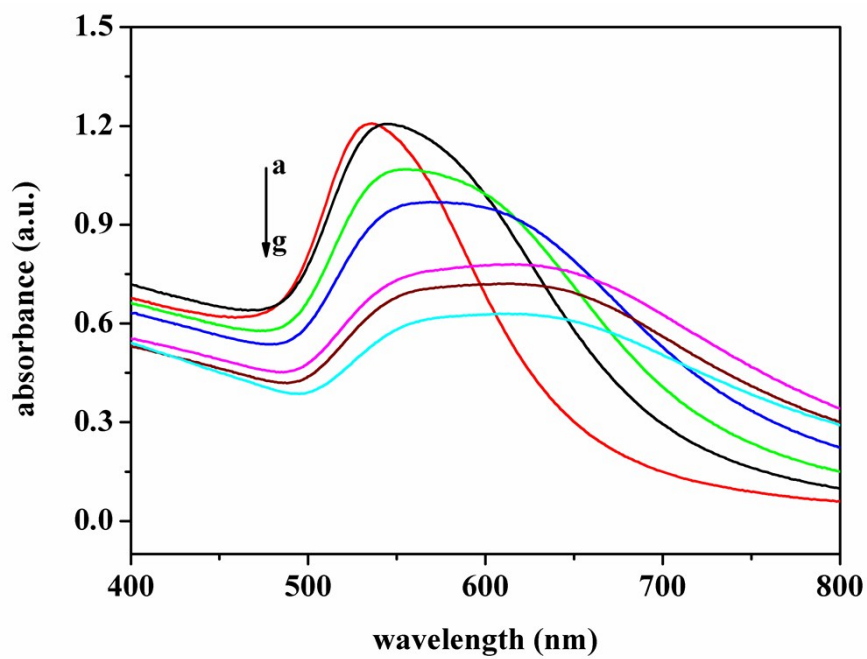

Figure S4 The UV-Vis spectra of Au@MIL-100 (Fe) (from a-g, recycle number is 0, 1, 2, 3, 4, 5, 7)

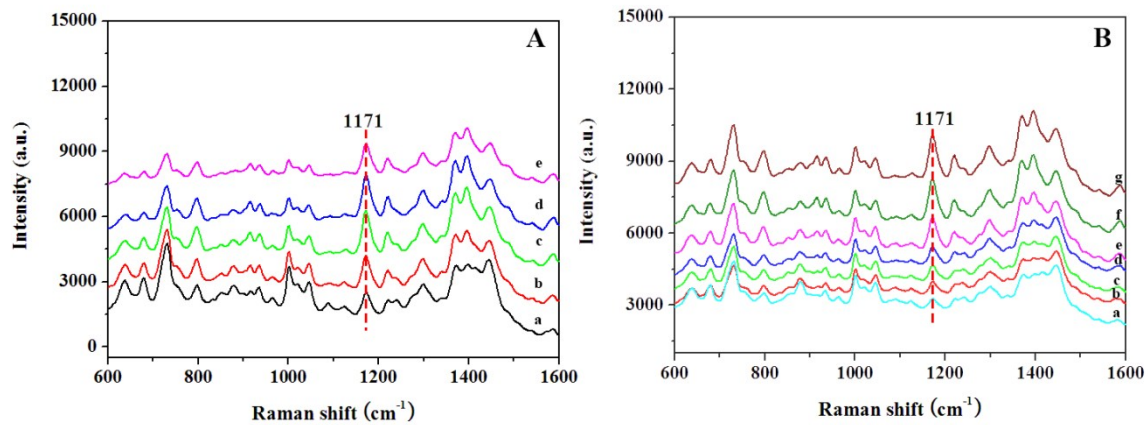

Figure S5 The investigate of the volume ratio (A) (from a to e, 1:1, 1:2, 1:3, 1:4, 1:5) and the mixing time (B) (from a to g, 0.25 min, 0.5 min, 1 min, 2 min, 3 min, 4 min, 5 min) of Au@MIL-100 (Fe) and MG solution.

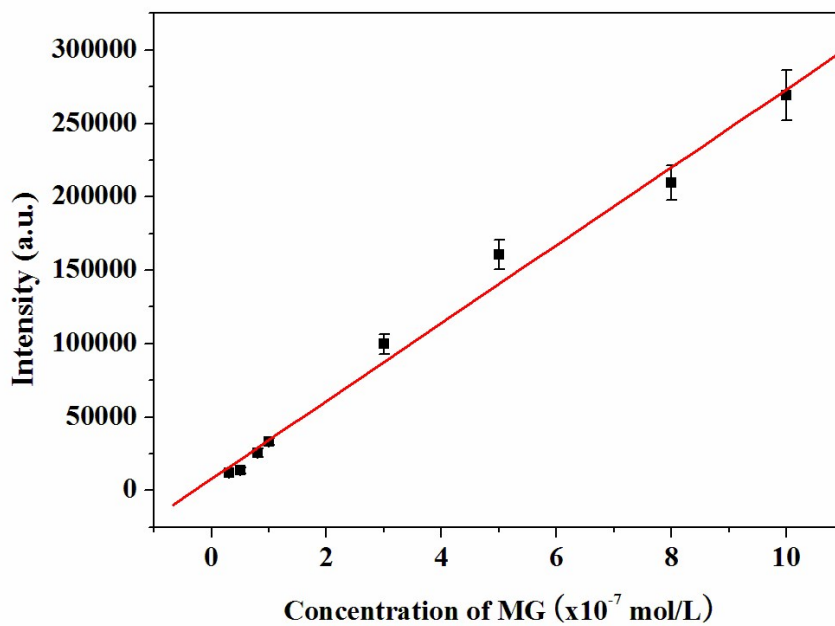

Figure S6 The Linear curve fitting of the SERS detection of MG
